# Supplementary material for: A time and energy conserving solution combustion synthesis of nano Li1.2Ni0.13Mn0.54Co0.13O2cathode material and its performance in Li-ion batteries
Source: Royal Society of Chemistry journal article supplement (doi:10.1039/c5ra19096g), 2015-01-01

## Electronic Supporting Information

for

### Time and energy conserving solution combustion synthesis of nano $\text{Li}_{1.2}\text{Ni}_{0.13}\text{Co}_{0.13}\text{Mn}_{0.54}\text{O}_2$ cathode material and its performance in Li-ion batteries

K. R. Prakasha,<sup>ab</sup> and A. S. Prakash<sup>a\*</sup>

<sup>a</sup> CSIR-Central Electrochemical Research Institute-Chennai unit, CSIR Madras Complex, Taramani, Chennai 600113, India

<sup>b</sup> Academy of Scientific and Innovative Research (AcSIR), CSIR- Central Electrochemical Research Institute-Chennai unit, CSIR Madras Complex, Chennai 600113, India

**Electronic Supporting information Table - S1.** Relevant thermodynamics data.

| Compound                                                   | $\Delta H_f$ (KJ mol <sup>-1</sup> ) |
|------------------------------------------------------------|--------------------------------------|
| $\text{LiNO}_{3(c)}$                                       | 579.72                               |
| $\text{Ni}(\text{NO}_3)_2 \cdot 6\text{H}_2\text{O}_{(c)}$ | 539.63                               |
| $\text{Co}(\text{NO}_3)_2 \cdot 6\text{H}_2\text{O}_{(c)}$ | 54.66                                |
| $\text{Mn}(\text{NO}_3)_2 \cdot 4\text{H}_2\text{O}_{(c)}$ | 311.2                                |
| $\text{CO}(\text{NH}_2)_2_{(c)}$                           | 582.92                               |
| $\text{C}_2\text{H}_5\text{NO}_{2(c)}$                     | 205.06                               |
| $\text{N}_{2(g)}$                                          | 0                                    |
| $\text{CO}_{2(g)}$                                         | 393.5                                |
| $\text{H}_2\text{O}_{(g)}$                                 | 241.8                                |
| (C)=Crystalline                                            | (g)= Gaseous                         |

**Electronic Supporting information Table - S2.** pH observations of reaction mixtures before and after the pre heat treatment.

| <b>SI No</b> | <b>Combustion solution</b>     | <b>Initial pH of the mixture</b> | <b>pH after heat treatment</b> |
|--------------|--------------------------------|----------------------------------|--------------------------------|
| <b>1</b>     | Urea+ Nitrates solution        | 5.33                             | 5.94                           |
| <b>2</b>     | Glycine+ Nitrates solution     | 3.32                             | 3.27                           |
| <b>3</b>     | Mixed fuels+ Nitrates solution | 3.22                             | 6.74                           |

**Electronic Supporting information Table - S3.** Structural parameters obtained from two phase rietveld refinement of XRD data for combustion synthesized  $\text{Li}_{1.2}\text{Ni}_{0.13}\text{Mn}_{0.54}\text{Co}_{0.13}\text{O}_2$  heated at 850 °C and lattice parameter for solid state synthesized phase.

| Phase 1: $\text{LiNi}_{1/3}\text{Co}_{1/3}\text{Mn}_{1/3}\text{O}_2$ ( $R\bar{3}m$ ) |      |                   |        |        |           |
|--------------------------------------------------------------------------------------|------|-------------------|--------|--------|-----------|
| Element                                                                              | Site | Wyckoff positions |        |        | Occupancy |
| Li1                                                                                  | 3b   | 0                 | 0      | 0      | 0.9800    |
| Ni1                                                                                  | 3b   | 0                 | 0      | 0      | 0.0200    |
| Li2                                                                                  | 3a   | 0                 | 0      | 0.5    | 0.0200    |
| Ni2                                                                                  | 3a   | 0                 | 0      | 0.5    | 0.3100    |
| Mn1                                                                                  | 3a   | 0                 | 0      | 0.5    | 0.3350    |
| Co1                                                                                  | 3a   | 0                 | 0      | 0.5    | 0.3366    |
| O1                                                                                   | 6c   | 0                 | 0      | 0.2440 | 1.0000    |
| a = 2.8487Å° c = 14.2216Å°                                                           |      |                   |        |        |           |
| Phase 2: $\text{Li}_2\text{MnO}_3$ (C2/m)                                            |      |                   |        |        |           |
| Element                                                                              | Site | Wyckoff positions |        |        | Occupancy |
| Li1                                                                                  | 2b   | 0                 | 0.5    | 0      | 0.8516    |
| Mn1                                                                                  | 2b   | 0                 | 0.5    | 0      | 0.1261    |
| Li2                                                                                  | 2c   | 0                 | 0      | 0.5    | 1.0080    |
| Li3                                                                                  | 4h   | 0                 | 0.7149 | 0.5    | 1.1811    |
| Mn2                                                                                  | 4h   | 0                 | 0.6740 | 0.5    | 0.0286    |
| Li4                                                                                  | 4g   | 0                 | 0.0870 | 0      | 0.0840    |
| Mn3                                                                                  | 4g   | 0                 | 0.1795 | 0      | 0.8507    |
| O1                                                                                   | 6c   | 0.2458            | 0      | 0.2130 | 1.0600    |
| O2                                                                                   | 8j   | 0.2491            | 0.3281 | 0.2429 | 2.0000    |
| a = 4.9540Å° b = 8.5153Å° c = 5.0094Å° β = 108.88°                                   |      |                   |        |        |           |
| Rwp = 10.2 Rp = 15.6 Chi 2 = 2.26 Phase ratio 5:5                                    |      |                   |        |        |           |
| Solid –State synthesized phase                                                       |      |                   |        |        |           |
| $R\bar{3}m$ :- a = b = 2.8453 Å°, c = 14.1906 Å°                                     |      |                   |        |        |           |
| C2/m:- a = 4.9680 Å°, b = 8.4936 Å°, c = 5.0360 Å°, β = 110.2°                       |      |                   |        |        |           |

**Electronic Supporting information Fig– S1.** FESEM image and Powder XRD pattern with Rietveld refinement of solid state synthesized  $\text{Li}_{1.2}\text{Ni}_{0.13}\text{Mn}_{0.54}\text{Co}_{0.13}\text{O}_2$  sample. The XRD pattern shows experimental pattern (red dots), calculated patterns (black lines), the difference curve (pink line) and Bragg diffraction positions (yellow ticks for  $R\bar{3}m$  space group and blue ticks for  $C2/m$  space group). The inset of figure shows FESEM image.

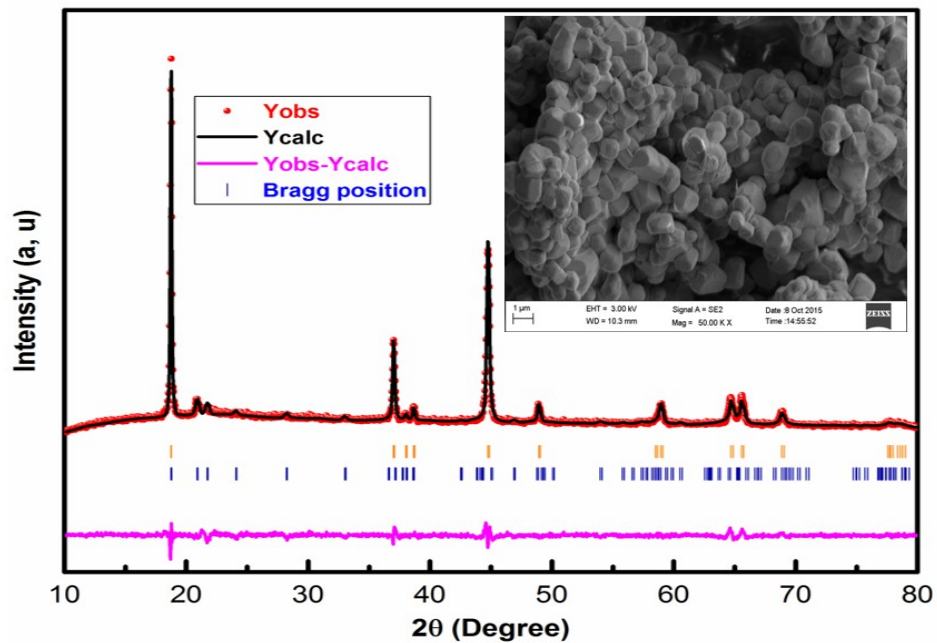

Supplement: c5ra19096g1.pdf [file c5ra19096g1.pdf]
